# Supplementary material for: Novel organosulfur donors containing hydroxy functionalities: synthesis of bis[2,2-bis(hydroxymethyl)propane-1,3-diyldithio]tetrathiafulvalene and related materials †
Source: Royal Society of Chemistry journal article supplement (doi:10.1039/b007660k), 2001-01-01
Supplement: b007660k.doc [file b007660k.doc]

# Supplementary data

Novel organosulfur donors containing hydroxy functionalities: synthesis of bis[2,2-bis(hydroxymethyl)propane-1,3-dithio]tetrathiafulvalene and related materials

**Turan Ozturk,****b* **Nezire Saygili,***a* **Serife Ozkara,***c* **Melanie Pilkington,***a* **Craig R. Rice, Deborah A. Tranter,***a* **Figen Turksoy,***b* **Deborah A. Tranter***a* **and John D. Wallis****a*

*a* *Department of Chemistry and Physics, The Nottingham Trent University, Clifton Lane, Nottingham, UK NG11 8NS. E-mail: john.wallis@ntu.ac.uk*

*b Department of Chemistry, TUBITAK – Marmara Research Centre Department of Chemistry P.O. Box 21 41470, Grebze-Kocaeli, Turkey*

*c Department of Physical Chemistry, Istanbul Technical University, Maslak, Istanbul, Turkey*

**Synthetic details for the preparation of 34**

**3-(*tert*-Butyldiphenylsilyloxy)prop-1-ene, S1**

To a solution of allyl alcohol (0.52 g, 9.0 mmol) in dry DMF (200 ml) was added sequentially imidazole (6.80 g, 100 mmol) and t-butyldiphenylsilyl chloride (2.75 g, 10 mmol). After stirring at room temperature for 20 h, dichloromethane was added and the organic layer was separated, washed sequentially with ice-cold HCl (3M, 3  50 ml) and water (50 ml) and dried over MgSO4. Removal of the solvent under reduced pressure afforded the silylated product **S1** (2.60 g, 96%) as a colourless oil: *H*: 7.65 (4H, m, Ar-*H*4), 7.38 (6H, m, Ar-*H*6), 5.91 (1H, ddt, *J* 17.0, 10.4, 4.3Hz, 2-*H*), 5.38 (1H, dq, *J* 17.0, 1.9Hz, 1-*H* (trans to 2-H)), 5.11 (1H, dq, *J* 10.4, 1.9Hz, 1-*H* (cis to 2-H)), 4.20 (2H, m, 3-*H*2), 1.07 (9H, s, 3  C*H*3); *C*: 136.9, 135.5, 129.6 & 127.6 (Ar-*C*12), 133.6 (2-*C*), 113.8 (1-*C*), 64.6 (3-*C*), 26.8 (3*C*H3), 19.3 (*C*(CH3)3); *max* (evaporated film): 3470, 3070, 2934, 1590, 1468, 1428, 1112, 822 cm-1; found C, 77.4; H, 8.4%, C19H24OSi requires C, 77.0; H, 8.2%; *m/z* (CI): 314 ([M+NH3+H]+, 65), 297 ([M+H]+, 100), 239 (M-C(CH3)3, 19%); *HRMS*: (CI) found [M+H]+ 297.1684, [C19H24OSi + H]+ requires 297.1675.

**3-(*tert*-Butyldiphenylsilyloxy)-1,2-dibromopropane, S2**

To a stirred solution of the allyl silyl ether **S1** (7.00 g, 23.6 mmol) in chloroform maintained at 0C was added slowly, dropwise, a solution of bromine (3.78 g, 23.6 mmol) in chloroform (70 ml). The resultant mixture was stirred for a further 30 min at that temperature, after which time it was allowed to warm to room temperature and stirred for a further 3 h. The solution was washed with aqueous sodium thiosulfate solution (2  10 ml), water (2  10 ml) and dried over MgSO4 and the solvent removed *in vacuo* to afford the dibromo product **S2** (9.81 g, 91%) as a colourless oil: *H*: 7.68 (4H, m, Ar-*H*4), 7.39 (6H, m, Ar-*H*6), 4.20 (1H, m, 2-*H*), 4.09 (1H, dd, *J* 11.3, 3.8Hz, 3-*H*), 4.00-3.91 (2H, m, 3-*H* & 1-*H*), 3.83 (1H, dd, *J* 10.2, 4.7 Hz, 1-*H*), 1.09 (9H, s, 3  C*H*3); *C*: 135.6, 135.5, 129.8 & 127.8 (Ar-*C12*), 64.6 (3-*C*), 51.5 (2-*C*), 32.6 (1-*C*), 26.7 (3  *C*H3), 19.3 (*C*(CH3)3); *max* (evaporated film): 3070, 2934, 2860, 1468, 1428, 1112, 702 cm-1; found C, 49.9; H, 5.2%, C19H24Br2OSi requires C, 50.0; H, 5.3%; *HRMS*: (CI) found [M + NH3 + H]+ 472.0307, [C19H24OSiBr2 + NH3 + H]+ requires 472.0307.

**5-(*tert*-Butyldiphenylsilyloxy)methyl-5,6-dihydro-1,3-dithiolo[4,5-b]1,4-dithiin-2-thione, S3**

To a stirred solution of the disodium salt of 2-thioxo-1,3-dithiole-4,5-dithiolate (4.56 g,18.8 mmol)15,16 in dry THF (80 ml) under nitrogen at 0C was added a solution of the dibromo compound **S2** (8.57 g, 18.8 mmol) in THF (40 ml)at room temperature. After stirring for 12 h, the solvent was removed under reduced pressure and the residue was extracted with dichloromethane (40 ml), washed with water (3  20 ml), dried over MgSO4 and concentrated *in vacuo*. Purification by flash chromatography (hexane/ethyl acetate (10:1)) afforded **S3** (4.97 g, 54%) as a yellow solid; mp 100-102°C. *H*: 7.66 (4H, m, Ar-*H*4), 7.37 (6H, m, Ar-*H*6), 3.98-3.75 (3H, 2  m, C*H*2O & 5-*H*), 3.31 (1H, dd, *J* 13.5, 5.8 Hz, 6-*H*), 3.19 (1H, dd, *J* 13.5, 2.8 Hz, 6-*H*), 1.08 (9H, s, 3  C*H*3); *C*: 207.1 (*C*=S), 135.3, 132.3, 129.9 & 127.7 (Ar-*C12*), 123.7, 121.9 (3a-, 7a-*C*), 64.6 (*C*H2O), 45.1 (5-*C*), 31.1 (6-*C*), 26.7 (3  *C*H3), 19.1 (*C*(CH3)3); *max*: 1109, 1062, 1025, 893, 821, 737, 704, 604 cm-1; *m/z*: (CI) 493 ([M + H]+, 20), 492 (M+, 20), 435 (65), 239 (35), 161 (100), 117 (43), 105 (29), 77 (25%); *HRMS*: (CI) found [M + H ] + 493.0278, [C22H24OS5Si + H]+ requires 493.0278.

5-(*tert*-Butyldiphenylsilyloxy)methyl-5,6-dihydro-1,3-dithiolo[4,5-b]1,4-dithiin-2-one, S4

To a solution of the thione **S3** (3.98 g, 8.1 mmol) in chloroform (70 ml) was added glacial acetic acid (23 ml) followed by mercuric acetate (3.87 g, 12.1 mmol) and the reaction mixture was stirred at room temperature for 2 h by which time the solution lightened in colour and a white precipitate was obtained. The resultant precipitate was removed by filtration, and the filtrate washed sequentially with water (100 ml), aqueous NaHCO3 (3  100 ml), water (50 ml) and dried over MgSO4. Removal of the solvent under reduced pressure, followed by purification by flash chromatography (hexane/ethyl acetate (10:1)) afforded the product **S4** as a pale yellow oil (3.81 g, 99 %): *H*: 7.67 (4H, m, Ar-*H*4), 7.39 (6H, m, Ar-*H*6), 3.99 (1H, dd, J 12.1, 9.9 Hz, 5-*CH*), 3.83 ( 1H, m, 5-*H),* 3.82 (1H, dd, J 12.1, 5.7 Hz, 5-C*H*), 3.32(1H, dd, J 13.3, 5.5 *Hz*, 6-*H*), 3.23 (1H, dd, J 13.4, 3.2 Hz, 6-*H*), 1.07 (9H, s, 3  C*H*3); *C*: 188.7 (*C*=O), 135.5, 132.7, 130.0 & 127.9 (Ar-*C12*), 114.4 & 112.7 (3a-, 7a-*C*), 64.9 (*C*H2O), 47.1 (5-*C*), 32.3 (6-*C*), 26.8 (3  *C*H3), 19.3 (*C*(CH3)3); *max* (evaporated film): 2958, 2858, 1678, 1590, 1468, 1262, 1112, 868 and 704 cm-1; *HRMS*: (CI) found [M + NH3 + H]+ 494.0772, [C22H24O2S4Si + NH3 + H]+ requires 494.0772.
